# Supplementary material for: Genomic and molecular characterisation of a KPC-producing Klebsiella pneumoniae clinical isolate resistant to meropenem-vaborbactam, imipenem-relebactam, and ceftazidime-avibactam
Source: Research Square preprint supplement (doi:10.21203/rs.3.rs-8289965/v1), 2025-12-22
Supplement: Supplementary file 1 [file 08ec7cde8cbfbfa086c90ee1.xlsx]

## Sheet: Supplementary Table 1
Supplementary Table 1. Bakta annotation of plasmid pKpMVS1_1 in isolate KpMVS1. This plasmid was used as the reference to compare with plasmids pKpMVR1_1 and pKpMVS2_1 (Supplementary Figure 1, Additional File 2). "Δ" represents a truncated or interrupted genetic feature, and the asterisk represents a variant of an insertion sequence or transposon. Abbreviations: CDS, coding sequence; IS, insertio…
Locus	Type	Start	Stop	Strand	Gene	Product	Functional category	Biological process	Molecular function	Cellular component
AONFFD_00005	CDS	1	858	plus	repA	IncFII family plasmid replication initiator RepA	plasmid maintenance	plasmid maintenance (GO:0006276)	none	none
AONFFD_00010	CDS	2078	2641	plus		ProQ/FinO domain-containing protein	expression regulation	post-transcriptional regulation of gene expression (GO:0010608)	RNA binding (GO:0003723); RNA strand annealing activity (GO:0033592); RNA strand-exchange activity (GO:0034057)	cytosol (GO:0005829)
AONFFD_00015	CDS	2625	3236	plus		DUF2913 domain-containing protein	unclassified	none	none	none
AONFFD_00020_ext	IS	3443	3580	minus	ΔISSen7*	Frameshifted transposase	insertion sequence	none	none	none
AONFFD_00025	CDS	3633	4625	minus		Cytoplasmic protein	unclassified	none	none	none
AONFFD_00030	CDS	4674	4829	minus		Prophage protein	unclassified	none	none	none
del(ISKpn31)-3'	IS	5013	5072	minus	ΔISKpn31	60 bp at the 3' end of ISKpn31	insertion sequence	none	none	none
AONFFD_00035-00065	Tn	5072	14978	plus	Tn4401a*	Tn3-family transposon carrying blaKPC-2	transposon	none	none	none
AONFFD_00055	CDS	12174	13055	plus	blaKPC-2	carbapenem-hydrolyzing class A beta-lactamase KPC-2	antimicrobial resistance	antibiotic catabolic process (GO:0017001); beta-lactam antibiotic catabolic process (GO:0030655); response to antibiotic (GO:0046677)	beta-lactamase activity (GO:0008800)	none
del(ISKpn31)-5'	IS	14978	17252	minus	ΔISKpn31	2275 bp from the 5' end of the same ISKpn31 as the previous one	insertion sequence	none	none	none
AONFFD_00075	CDS	18114	18734	minus		Resolvase	DNA recombination	DNA recombination (GO:0006310)	DNA strand exchange activity (GO:0000150); DNA binding (GO:0003677)	none
AONFFD_00080_ext	Tn	18790	21729	minus	ΔTn5403*	Truncated (724 bp from the 5' end) Tn5403 variant	transposon	none	none	none
AONFFD_00085_trim	IS	21730	22413	plus	ΔIS26/15DII*	3' end truncated IS26/15DII variant (single-base insertion in the match region 1..685 of IS26/15DII, which caused a frameshif mutation that extended the IS26/15DII transposase, which started at 21793, to extends beyond its normal length of 705 bp)	insertion sequence	none	none	none
AONFFD_00090	CDS	22874	24055	plus	nhaA	Na+/H+ antiporter NhaA	transmembrane transport	sodium ion transport (GO:0006814); regulation of pH (GO:0006885)	sodium:proton antiporter activity (GO:0015385)	membrane (GO:0016020)
AONFFD_00095-00115	Tn	24492	29138	plus	ΔTnPa38*	5' and 3' ends truncated variant of TnPa38 (Tn3 family)	transposon	none	none	none
AONFFD_00120_var	IS	29138	29766	plus	ΔIS4321R*	Upstream fragment of an IS4321R variant interrupted by an ISEc22*	insertion sequence	none	none	none
AONFFD_00125-00130	IS	29767	32220	minus	ISEc22*	Variant of ISEc22 (IS66 family)	insertion sequence	none	none	none
AONFFD_00135-00140	IS	32217	32926	plus	ΔIS4321R*	Downstream fragment of the IS4321R variant interrupted by an ISEc22*	insertion sequence	none	none	none
AONFFD_00145	CDS	33070	33273	minus		Hemolysin expression modulator Hha	expression regulation	none	none	none
AONFFD_00150	CDS	33307	33675	minus		hypothetical protein	unclassified	none	none	none
AONFFD_00155	CDS	33719	34213	minus		DNA-binding protein	unclassified	none	none	none
AONFFD_00160	CDS	34244	34816	minus	ydeA	YdeA	unclassified	none	none	none
AONFFD_00165	CDS	34813	35061	minus		(pseudo) hypothetical protein	unclassified	none	none	none
AONFFD_00170	CDS	35498	36187	plus		RES family NAD+ phosphorylase	unclassified	none	none	none
AONFFD_00175	CDS	36219	36908	minus		Helix-turn-helix domain-containing protein	unclassified	none	none	none
AONFFD_00180	CDS	37462	37680	plus	ccdA	type II toxin-antitoxin system antitoxin CcdA	plasmid maintenance	none	none	none
AONFFD_00185	CDS	37682	37987	plus	ccdB	type II toxin-antitoxin system toxin CcdB	plasmid maintenance	plasmid maintenance (GO:0006276)	DNA topoisomerase type II (double strand cut, ATP-hydrolyzing) inhibitor activity (GO:0008657)	none
AONFFD_00190	CDS	38156	38551	plus		hypothetical protein	unclassified	none	none	none
AONFFD_00195	CDS	38578	38901	plus		hypothetical protein	unclassified	none	none	none
AONFFD_00200	CDS	38898	39914	plus		N-acetyltransferase domain-containing protein	unclassified	none	none	none
AONFFD_00205	CDS	40112	40906	plus	xerD	Site-specific recombinase XerD	DNA recombination	DNA recombination (GO:0006310); DNA integration (GO:0015074)	DNA binding (GO:0003677)	none
AONFFD_00210_ext	IS	41052	42247	plus	ISKpn26*	ISKpn26 variant (IS5 family)	insertion sequence	none	none	none
AONFFD_00215	CDS	42893	43519	minus	parA	ParA family plasmid-partitioning AAA ATPase	plasmid transfer	none	none	none
oriV	oriV	43520	44143	plus	oriV	origin of replication	plasmid maintenance	none	none	none
AONFFD_00220	CDS	44144	45019	minus		DNA replication	plasmid maintenance	none	none	none
AONFFD_00225	CDS	45431	46702	minus	dinP	Nucleotidyltransferase/DNA polymerase DinP involved in DNA repair	plasmid maintenance	SOS response (GO:0009432); error-prone translesion synthesis (GO:0042276)	DNA-directed DNA polymerase activity (GO:0003887)	cytosol (GO:0005829)
AONFFD_00230	CDS	46702	47133	minus		Translesion error-prone DNA polymerase V autoproteolytic subunit	plasmid maintenance	none	none	none
AONFFD_00235	CDS	47618	49027	plus	ltrA	group II intron reverse transcriptase/maturase	unclassified	none	none	none
AONFFD_00240	CDS	49276	50247	plus		Plasmid segregation protein ParM/StbA domain-containing protein	plasmid transfer	none	none	none
AONFFD_00245	CDS	50250	50921	plus		Mediator of plasmid stability	plasmid maintenance	none	none	none
AONFFD_00250	CDS	50983	51213	plus		hypothetical protein	unclassified	none	none	none
AONFFD_00255	CDS	51821	52054	plus		Cytoplasmic protein	unclassified	none	none	none
AONFFD_00260	CDS	52051	52386	plus		Cytoplasmic protein	unclassified	none	none	none
AONFFD_00265	CDS	52772	53473	plus	yhdJ	DNA modification methylase	unclassified	none	none	none
AONFFD_00270	CDS	53473	53694	plus		Cytoplasmic protein	unclassified	none	none	none
AONFFD_00275	CDS	53704	54123	plus		Adenine-specific methyltransferase	unclassified	none	none	none
AONFFD_00280	CDS	54177	54944	plus		Inner membrane protein	unclassified	none	none	none
AONFFD_00285	CDS	55625	56053	plus		Antirestriction protein	plasmid maintenance	none	none	none
AONFFD_00290	CDS	56096	56602	plus	ardA	Antirestriction protein ArdA	plasmid maintenance	none	none	none
AONFFD_00295	CDS	56645	56836	plus	areA	AreA	unclassified	none	none	none
AONFFD_00300	CDS	57018	57278	plus		DNA polymerase III subunit theta	plasmid maintenance	DNA replication (GO:0006260)	DNA binding (GO:0003677); DNA-directed DNA polymerase activity (GO:0003887)	none
AONFFD_00305	CDS	57313	57633	plus		hypothetical protein	unclassified	none	none	none
AONFFD_00310	CDS	58330	58872	plus	ssb	Single-stranded DNA-binding protein	plasmid maintenance	DNA replication (GO:0006260); positive regulation of helicase activity (GO:0051096)	single-stranded DNA binding (GO:0003697)	nucleoid (GO:0009295)
AONFFD_00315	CDS	58921	59169	plus		Cytoplasmic protein	unclassified	none	none	none
AONFFD_00320	CDS	59238	61238	plus		ParB/Sulfiredoxin domain-containing protein	plasmid transfer	chromosome segregation (GO:0007059)	none	chromosome (GO:0005694)
AONFFD_00325	CDS	61282	61713	plus	psiB	conjugation system SOS inhibitor PsiB	plasmid transfer	none	none	none
AONFFD_00330	CDS	61710	62438	plus		Plasmid SOS inhibition protein A	plasmid transfer	none	none	none
AONFFD_00335	CDS	62435	62761	plus		Theronine dehydrogenase	unclassified	none	none	none
AONFFD_00340	CDS	62817	63191	plus		hypothetical protein	unclassified	none	none	none
AONFFD_00345	ncRNA	63250	63424	plus	sok	sok antitoxin (CssrC)	plasmid maintenance	none	none	none
AONFFD_00350-55	IS	63348	64750	plus	ΔISKpn8*	ISKpn8 (IS3 family) variant (99.9% nucleotide identity and 97.3% query coverage)	insertion sequence	none	none	none
AONFFD_00360_ext	IS	64748	65843	minus	ISKpn28*	Variant of ISKpn28 (IS481 family) truncating ISKpn8*	insertion sequence	none	none	none
AONFFD_00365	CDS	65857	66018	plus		Type I toxin-antitoxin system Hok family toxin	plasmid maintenance	none	none	membrane (GO:0016020)
AONFFD_00370	CDS	67026	67406	plus		hypothetical protein	unclassified	none	none	none
AONFFD_00375	CDS	67473	67820	plus		hypothetical protein	unclassified	none	none	none
AONFFD_00380	CDS	67915	68061	plus		Succinate dehydrogenase flavoprotein subunit	unclassified	none	none	none
AONFFD_00385	CDS	68112	68945	plus	hsdM	Type I restriction-modification system, DNA methylase subunit	plasmid maintenance	none	none	none
AONFFD_00390	CDS	69765	70586	plus		DUF945 domain-containing protein	unclassified	none	none	none
AONFFD_00395	CDS	71489	71878	plus	traM	conjugal transfer relaxosome DNA-binding protein TraM	plasmid transfer	none	DNA binding (GO:0003677)	none
ncRNA-region	ncRNA-region	72014	72122	plus		traJ 5' UTR	ncRNA	none	none	none
AONFFD_00400	ncRNA	72046	72123	minus	finP	FinP	ncRNA	none	none	none
AONFFD_00405	CDS	72117	72791	plus	traJ	Conjugal transfer transcriptional regulator TraJ	plasmid transfer	none	none	none
AONFFD_00410	CDS	73209	73577	plus	traA	type IV conjugative transfer system pilin TraA	plasmid transfer	none	none	extracellular region (GO:0005576)
AONFFD_00415	CDS	73591	73896	plus	traL	type IV conjugative transfer system protein TraL	plasmid transfer	pilus assembly (GO:0009297)	none	cell outer membrane (GO:0009279); outer membrane (GO:0019867)
AONFFD_00420	CDS	73916	74482	plus	traE	type IV conjugative transfer system protein TraE	plasmid transfer	none	none	none
AONFFD_00425	CDS	74469	75209	plus	traK	type-F conjugative transfer system secretin TraK	plasmid transfer	none	none	none
AONFFD_00430	CDS	75209	76633	plus	traB	F-type conjugal transfer pilus assembly protein TraB	plasmid transfer	none	none	none
AONFFD_00435	CDS	76953	77210	plus	traV	type IV conjugative transfer system lipoprotein TraV	plasmid transfer	none	none	none
AONFFD_00440	CDS	77673	78083	plus		Lipoprotein	unclassified	none	none	none
AONFFD_00445	CDS	78474	78785	plus		Inner membrane protein	unclassified	none	none	none
AONFFD_00450	CDS	78852	79256	plus		Membrane associated protein	unclassified	none	none	none
AONFFD_00455	CDS	79253	79366	plus		hypothetical protein	unclassified	none	none	none
AONFFD_00460	CDS	79605	79997	plus		Acyltransferase	unclassified	none	none	none
AONFFD_00465	CDS	80069	82708	plus	traC	type IV secretion system protein TraC	plasmid transfer	none	none	none
AONFFD_00470	CDS	82705	83097	plus	trbI	type-F conjugative transfer system protein TrbI	plasmid transfer	none	none	none
AONFFD_00475	CDS	83097	83723	plus	traW	type-F conjugative transfer system protein TraW	plasmid transfer	none	none	none
AONFFD_00480	CDS	83945	84142	plus		hypothetical protein	unclassified	none	none	none
AONFFD_00485	CDS	84139	85128	plus	traU	conjugal transfer pilus assembly protein TraU	plasmid transfer	none	none	none
AONFFD_00490	CDS	85143	85691	plus		hypothetical protein	unclassified	none	none	none
AONFFD_00495	CDS	85666	86355	minus		hypothetical protein	unclassified	none	none	none
AONFFD_00500	CDS	86412	87014	plus		Inner membrane protein	unclassified	none	none	none
AONFFD_00505	CDS	87158	87805	plus	trbC	Type-F conjugative transfer system pilin assembly protein TrbC	plasmid transfer	none	none	none
AONFFD_00510	CDS	87864	89819	plus	traN	type-F conjugative transfer system mating-pair stabilisation protein TraN	plasmid transfer	none	none	none
AONFFD_00515	CDS	89851	90105	plus	trbE	Conjugal transfer protein TrbE	plasmid transfer	none	none	none
AONFFD_00520	CDS	90065	90331	plus		hypothetical protein	unclassified	none	none	none
AONFFD_00525	CDS	90344	90670	plus		Membrane associated protein	unclassified	none	none	none
AONFFD_00530	CDS	90691	91443	plus	traF	type-F conjugative transfer system pilin assembly protein TraF	plasmid transfer	none	none	none
AONFFD_00535	CDS	91454	91693	plus	traQ	type-F conjugative transfer system pilin chaperone TraQ	plasmid transfer	none	none	none
AONFFD_00540	CDS	91665	92237	plus	trbB	type-F conjugative transfer system pilin assembly thiol-disulfide isomerase TrbB	plasmid transfer	none	none	none
AONFFD_00545	CDS	92230	92658	plus	trbF	Conjugal transfer protein TrbF	plasmid transfer	none	none	none
AONFFD_00550	CDS	92645	94015	plus	traH	conjugal transfer pilus assembly protein TraH	plasmid transfer	none	none	none
AONFFD_00555	CDS	94015	96888	plus	traG	conjugal transfer mating-pair stabilization protein TraG	plasmid transfer	none	none	none
AONFFD_00560	ncRNA	94764	94849	minus	AS-traG	Antisense to traG	plasmid transfer	none	none	none
AONFFD_00565	CDS	96899	97432	plus	traS	Conjugal transfer entry exclusion protein TraS	plasmid transfer	none	none	none
AONFFD_00570	CDS	97623	98315	plus		Integron gene cassette protein	unclassified	none	none	none
AONFFD_00575	CDS	98441	100750	plus	traD	type IV conjugative transfer system coupling protein TraD	plasmid transfer	none	none	none
AONFFD_00580	CDS	100750	106008	plus	traI	conjugative transfer relaxase/helicase TraI	plasmid transfer	none	none	none
AONFFD_00585	CDS	106088	106813	plus	traX	type-F conjugative transfer system pilin acetylase TraX	plasmid transfer	none	none	none
AONFFD_00590	CDS	106968	107564	plus	proQ	sRNA-binding protein ProQ	unclassified	none	none	none
AONFFD_00595	CDS	107584	107931	plus		RelE/StbE replicon stabilization toxin	plasmid maintenance	none	none	none
AONFFD_00600	CDS	108402	109046	plus		Inner membrane ABC-transporter	transmembrane transport	none	none	none
AONFFD_00605	CDS	109102	109752	plus		DUF2726 domain-containing protein	unclassified	none	none	none
AONFFD_00610	CDS	109749	110060	plus		Prophage protein	unclassified	none	none	none
AONFFD_00615	CDS	110157	110717	plus	cls	Phosphatidylserine/phosphatidylglycerophosphate/cardiolipin synthase	metabolism	none	RNA endonuclease activity, producing 5'-phosphomonoesters (GO:0016891)	none
AONFFD_00620	CDS	110854	111105	plus	copB	Protein CopB	plasmid maintenance	plasmid maintenance (GO:0006276)	none	none
AONFFD_00625	ncRNA	111228	111316	minus	copA	CopA-like RNA	ncRNA	none	none	none

## Sheet: Supplementary Table 2
Supplementary Table 2. Results of MegaBLAST search of Tn4401a in KpMVS1, KpMVR1, and KpMVS2 genomes. Genomic coordinates are presented in the format "(GenBank accession:Start coordinate–end coordinate)". The notation "c" in genomic coordinates indicates that the query sequence was found in the minus (that is, reverse complementary) strand of a plasmid sequence.
Isolate	Subject	Query	Mismatches	Gap	Query start	Query end	Query coverage	Subject start	Subject end	Length	Strand	Target site duplication
KpMVS1	pKpMVS1_1	Tn4401a (KT378596.1:8–9914)	4	0	1	9907	1	5072	14978	9907	plus	ATTGA (CP182607.1:5067–5071, 14979–14983)
KpMVR1	pKpMVR1_1	Tn4401a (KT378596.1:8–9914)	5	0	1	9907	1	30242	40148	9907	minus	ATTGA [CP182601.1:c(30237–30241, c(40149–40153)]
KpMVS2	pKpMVS2_1	Tn4401a (KT378596.1:8–9914)	3	0	1	9907	1	5072	14978	9907	plus	ATTGA (CP182594.1:5067–5071, 14979–14983)

## Sheet: Supplementary Table 3
Supplementary Table 3. Locations and predicted biological functions of genetic features within the 54.7-kbp region of the KpMVS1 chromosome as illustrated in Figure 1. Locus tags and coordinates of these features refer to annotations of the KpMVS1 chromosome. Each asterisk indicates an allele from a gene family. Abbreviation: CDS, coding sequence.
Locus	Type	Start	Stop	Strand	Gene	Product	Functional category	Biological process	Molecular function	Cellular component
AONFFD_11410	CDS	2200339	2201334	plus	wcaG	Nucleoside-diphosphate-sugar epimerase	unclassified	none	none	none
AONFFD_11415	CDS	2201508	2202044	plus	acrR*	DNA-binding protein, AcrR family, includes nucleoid occlusion protein SlmA	transcriptional regulation	regulation of DNA-templated transcription (GO:0006355)	transcription cis-regulatory region binding (GO:0000976); DNA-binding transcription factor activity (GO:0003700)	none
AONFFD_11420	CDS	2202119	2203228	plus	acrA*	AcrA-family multidrug efflux pump subunit (membrane-fusion protein)	transmembrane transport	transmembrane transport (GO:0055085)	efflux transmembrane transporter activity (GO:0015562); transmembrane transporter activity (GO:0022857)	membrane (GO:0016020); efflux pump complex (GO:1990281)
AONFFD_11425	CDS	2203225	2206317	plus	acrB*	AcrB-family multidrug efflux pump subunit	transmembrane transport	transmembrane transport (GO:0055085)	transmembrane transporter activity (GO:0022857); xenobiotic transmembrane transporter activity (GO:0042910)	plasma membrane (GO:0005886); membrane (GO:0016020)
AONFFD_11430	CDS	2206373	2207557	minus	lldD	FMN-dependent L-lactate dehydrogenase LldD	metabolism	lactate metabolic process (GO:0006089); lactate oxidation (GO:0019516)	lactate dehydrogenase activity (GO:0004457); L-lactate dehydrogenase activity (GO:0004459); FMN binding (GO:0010181); oxidoreductase activity (GO:0016491)	plasma membrane (GO:0005886)
AONFFD_11435	CDS	2207799	2208134	plus		Signal peptide protein	unclassified	none	none	none
AONFFD_11440	CDS	2208618	2208995	plus	sufA	Fe-S cluster assembly scaffold SufA	metabolism	iron-sulfur cluster assembly (GO:0016226); protein maturation by iron-sulfur cluster transfer (GO:0097428)	iron-sulfur cluster binding (GO:0051536); 2 iron, 2 sulfur cluster binding (GO:0051537)	cytoplasm (GO:0005737); cytosol (GO:0005829)
AONFFD_11445	CDS	2208998	2210485	plus	sufB	Fe-S cluster assembly protein SufB	metabolism	iron-sulfur cluster assembly (GO:0016226)	none	none
AONFFD_11450	CDS	2210502	2211248	plus	sufC	Fe-S cluster assembly ATPase SufC	metabolism	none	ATP binding (GO:0005524); ATP hydrolysis activity (GO:0016887)	none
AONFFD_11455	CDS	2211223	2212497	plus	sufD	Fe-S cluster assembly protein SufD	metabolism	iron-sulfur cluster assembly (GO:0016226)	none	none
AONFFD_11460	CDS	2212494	2213714	plus	sufS	cysteine desulfurase SufS	metabolism	cysteine metabolic process (GO:0006534)	pyridoxal phosphate binding (GO:0030170); cysteine desulfurase activity (GO:0031071)	none
AONFFD_11465	CDS	2213726	2214142	plus	sufE	cysteine desulfuration protein SufE	metabolism	sulfur compound metabolic process (GO:0006790); iron-sulfur cluster assembly (GO:0016226)	none	none
AONFFD_11470	CDS	2214242	2215228	plus	erfK	Lipoprotein-anchoring transpeptidase ErfK/SrfK	cell wall/membrane biosynthesis	peptidoglycan-protein cross-linking (GO:0018104)	peptidoglycan L,D-transpeptidase activity (GO:0071972)	extracellular region (GO:0005576)
AONFFD_11475	CDS	2215290	2215526	minus	lpp1	Major outer membrane lipoprotein Lpp 1	cell wall/membrane biosynthesis	none	none	outer membrane (GO:0019867)
AONFFD_11480	CDS	2215839	2217251	minus	pykF	pyruvate kinase PykF	metabolism	glycolytic process (GO:0006096)	magnesium ion binding (GO:0000287); catalytic activity (GO:0003824); pyruvate kinase activity (GO:0004743); potassium ion binding (GO:0030955)	cytoplasm (GO:0005737)
AONFFD_11485	CDS	2217757	2217969	plus	fumD	fumarate hydratase FumD	unclassified	none	none	none
AONFFD_11490	CDS	2217987	2218625	minus	tetR*	TetR-family transcriptional regulator	transcriptional regulation	none	none	none
AONFFD_11495	CDS	2218752	2219408	plus		Inosose isomerase	unclassified	none	none	none
AONFFD_11500	CDS	2220000	2221523	plus	ltrA	group II intron reverse transcriptase/maturase	unclassified	none	none	none
AONFFD_11505	CDS	2221619	2222875	plus		sugar phosphate isomerase/epimerase and 4-hydroxyphenylpyruvate domain-containing protein	unclassified	none	none	none
AONFFD_11510	CDS	2222947	2224269	plus	uhpC	Sugar phosphate permease	transmembrane transport	transmembrane transport (GO:0055085)	transmembrane transporter activity (GO:0022857)	none
AONFFD_11515	CDS	2224285	2225121	plus	aroE	Shikimate 5-dehydrogenase	metabolism	chorismate biosynthetic process (GO:0009423); shikimate metabolic process (GO:0019632)	shikimate 3-dehydrogenase (NADP+) activity (GO:0004764); NADP binding (GO:0050661)	cytosol (GO:0005829)
AONFFD_11520	CDS	2225178	2225921	plus	modA	Molybdate ABC transporter substrate-binding protein	transmembrane transport	none	none	outer membrane-bounded periplasmic space (GO:0030288)
AONFFD_11525	CDS	2225905	2226654	minus	fepC*	ABC-type cobalamin/Fe3+-siderophores transport system, ATPase component	transmembrane transport	none	ATP binding (GO:0005524); ATP hydrolysis activity (GO:0016887); ATPase-coupled transmembrane transporter activity (GO:0042626)	ATP-binding cassette (ABC) transporter complex (GO:0043190)
AONFFD_11530	CDS	2226651	2227658	minus	fepD*	ABC-type Fe3+-siderophore transport system, permease component	transmembrane transport	siderophore-dependent iron import into cell (GO:0033214)	transmembrane transporter activity (GO:0022857)	membrane (GO:0016020)
AONFFD_11535	CDS	2227648	2228706	minus	fepB*	ABC-type Fe3+-hydroxamate transport system, periplasmic component	transmembrane transport	cellular response to iron ion (GO:0071281)	none	none
AONFFD_11540	CDS	2228798	2229610	minus	iclR	DNA-binding transcriptional regulator	transcriptional regulation	negative regulation of DNA-templated transcription (GO:0045892)	DNA binding (GO:0003677); DNA-binding transcription factor activity (GO:0003700)	none
AONFFD_11545	CDS	2229788	2231452	plus	mhpA	bifunctional 3-(3-hydroxy-phenyl)propionate/3-hydroxycinnamic acid hydroxylase	metabolism	3-(3-hydroxy)phenylpropionate catabolic process (GO:0019622)	3-(3-hydroxyphenyl)propionate hydroxylase activity (GO:0008688); FAD binding (GO:0071949)	none
AONFFD_11550	CDS	2231454	2232398	plus	mhpB	3-carboxyethylcatechol 2,3-dioxygenase	metabolism	none	iron ion binding (GO:0005506); ferrous iron binding (GO:0008198); oxidoreductase activity (GO:0016491); 3-carboxyethylcatechol 2,3-dioxygenase activity (GO:0047070)	none
AONFFD_11555	CDS	2232416	2233282	plus	mhpC	2-hydroxy-6-oxononadienedioate/2-hydroxy-6-oxononatrienedioate hydrolase	metabolism	none	hydrolase activity (GO:0016787); 2-hydroxy-6-oxonona-2,4-dienedioate hydrolase activity (GO:0018771); protein homodimerization activity (GO:0042803)	cytoplasm (GO:0005737)
AONFFD_11560	CDS	2233293	2234099	plus	mhpD	2-keto-4-pentenoate hydratase	metabolism	none	catalytic activity (GO:0003824); 2-oxopent-4-enoate hydratase activity (GO:0008684); manganese ion binding (GO:0030145)	cytoplasm (GO:0005737)
AONFFD_11565	CDS	2234092	2235042	plus	mhpF	acetaldehyde dehydrogenase (acetylating)	metabolism	catabolic process (GO:0009056)	acetaldehyde dehydrogenase (acetylating) activity (GO:0008774)	none
AONFFD_11570	CDS	2235039	2236055	plus	dmpG	4-hydroxy-2-oxovalerate aldolase	metabolism	catabolic process (GO:0009056); leucine biosynthetic process (GO:0009098)	catalytic activity (GO:0003824); 2-isopropylmalate synthase activity (GO:0003852); 4-hydroxy-2-oxovalerate aldolase activity (GO:0008701)	none
AONFFD_11575	CDS	2236131	2237327	plus		3-(3-hydroxy-phenyl)propionate transporter	transmembrane transport	transmembrane transport (GO:0055085)	transmembrane transporter activity (GO:0022857)	none
AONFFD_11580	CDS	2237430	2238155	plus	yfiH	Copper oxidase (laccase) domain	unclassified	none	copper ion binding (GO:0005507)	none
AONFFD_11585	CDS	2238168	2239748	minus	pspE	Rhodanese-related sulfurtransferase	unclassified	none	none	none
AONFFD_11590	CDS	2239754	2240356	minus		putative metal-dependent enzyme of the double-stranded beta helix superfamily	unclassified	none	iron ion binding (GO:0005506); ferrous iron binding (GO:0008198); oxidoreductase activity, acting on single donors with incorporation of molecular oxygen, incorporation of two atoms of oxygen (GO:0016702)	none
AONFFD_11595	CDS	2240463	2241356	plus	lysR	DNA-binding transcriptional regulator, LysR family	transcriptional regulation	regulation of DNA-templated transcription (GO:0006355)	transcription cis-regulatory region binding (GO:0000976)	none
AONFFD_11600	CDS	2241501	2242586	plus	ssuD	Flavin-dependent oxidoreductase, luciferase family (includes alkanesulfonate monooxygenase SsuD and methylene tetrahydromethanopterin reductase)	metabolism	alkanesulfonate catabolic process (GO:0046306)	alkanesulfonate monooxygenase activity (GO:0008726); oxidoreductase activity, acting on paired donors, with incorporation or reduction of molecular oxygen (GO:0016705)	none
AONFFD_11605	CDS	2242583	2243734	plus	caiA	Acyl-CoA dehydrogenase related to the alkylation response protein AidB	metabolism	none	none	none
AONFFD_11610	CDS	2243740	2244702	plus	tauA	ABC-type nitrate/sulfonate/bicarbonate transport system, periplasmic component	transmembrane transport	transport (GO:0006810)	ATPase-coupled transmembrane transporter activity (GO:0042626)	membrane (GO:0016020)
AONFFD_11615	CDS	2244699	2245736	plus	tauA	ABC-type nitrate/sulfonate/bicarbonate transport system, periplasmic component	transmembrane transport	transport (GO:0006810)	none	none
AONFFD_11620	CDS	2245717	2246712	plus	tauC	ABC-type nitrate/sulfonate/bicarbonate transport system, permease component	transmembrane transport	none	none	plasma membrane (GO:0005886)
AONFFD_11625	CDS	2246706	2247479	plus	tauB	ABC-type nitrate/sulfonate/bicarbonate transport system, ATPase component	transmembrane transport	none	ATP binding (GO:0005524); ATP hydrolysis activity (GO:0016887)	none
AONFFD_11630	CDS	2248062	2250134	minus	fhuE	Outer membrane receptor for ferric coprogen and ferric-rhodotorulic acid	transmembrane transport	siderophore transport (GO:0015891)	siderophore-iron transmembrane transporter activity (GO:0015343); siderophore uptake transmembrane transporter activity (GO:0015344); signaling receptor activity (GO:0038023)	cell outer membrane (GO:0009279)
AONFFD_11635	CDS	2250640	2251461	plus	fepC*	ABC-type cobalamin/Fe3+-siderophores transport system, ATPase component	transmembrane transport	none	ATP binding (GO:0005524); ATP hydrolysis activity (GO:0016887)	none
AONFFD_11640	CDS	2251458	2252483	plus	fepD*	ABC-type Fe3+-siderophore transport system, permease component	transmembrane transport	siderophore-dependent iron import into cell (GO:0033214)	transmembrane transporter activity (GO:0022857)	membrane (GO:0016020)
AONFFD_11645	CDS	2252480	2253532	plus	fepD*	ABC-type Fe3+-siderophore transport system, permease component	transmembrane transport	siderophore-dependent iron import into cell (GO:0033214)	transmembrane transporter activity (GO:0022857)	membrane (GO:0016020)
AONFFD_11650	CDS	2253546	2254499	plus	fepB*	ABC-type Fe3+-hydroxamate transport system, periplasmic component	transmembrane transport	none	none	outer membrane-bounded periplasmic space (GO:0030288)
AONFFD_11655	CDS	2254496	2255398	plus	rpiR	DNA-binding transcriptional regulator, MurR/RpiR family, contains HTH and SIS domains	transcriptional regulation	regulation of DNA-templated transcription (GO:0006355)	DNA binding (GO:0003677); DNA-binding transcription factor activity (GO:0003700); carbohydrate derivative binding (GO:0097367)	none
AONFFD_11660	CDS	2255491	2256258	plus	hisJ	ABC-type amino acid transport/signal transduction system, periplasmic component/domain	transmembrane transport	none	ligand-gated monoatomic ion channel activity (GO:0015276)	membrane (GO:0016020)
AONFFD_11665	CDS	2256322	2257086	plus	hisM	ABC-type amino acid transport system, permease component	transmembrane transport	amino acid transport (GO:0006865); transmembrane transport (GO:0055085)	none	plasma membrane (GO:0005886); membrane (GO:0016020)
AONFFD_11670	CDS	2257073	2257795	plus	ehuA	ABC-type polar amino acid transport system, ATPase component	transmembrane transport	amino acid transmembrane transport (GO:0003333)	ATP binding (GO:0005524); ABC-type amino acid transporter activity (GO:0015424); ATP hydrolysis activity (GO:0016887)	none

## Sheet: Supplementary Table 4
Supplementary Table 4. Locations and predicted biological functions of genetic features within the 19.7-kbp region illustrated in Supplementary Figure 3, Additional File 2. Locus tags and coordinates of these features refer to annotations of the KpMVS1 chromosome. “IS1X2*” denotes a variant of the IS1-family insertion sequence IS1X2 (98% nucleotide identity and 100% query coverage). Abbreviation:…
Locus	Type	Start	Stop	Strand	Gene	Product	Functional category	Biological process	Molecular function	Cellular component
AONFFD_05835	CDS	1048562	1049296	plus	cysH	phosphoadenosine phosphosulfate reductase	metabolism	sulfate assimilation, phosphoadenylyl sulfate reduction by phosphoadenylyl-sulfate reductase (thioredoxin) (GO:0019379)	catalytic activity (GO:0003824); phosphoadenylyl-sulfate reductase (thioredoxin) activity (GO:0004604)	cytoplasm (GO:0005737)
IS1X2_var1	IS	1049723	1050490	minus	IS1X2*	IS1X2 variant	IS
AONFFD_05850	CDS	1050702	1052942	plus	cas3	HD Cas3-type domain-containing protein	defence	none	RNA binding (GO:0003723); RNA helicase activity (GO:0003724)	none
AONFFD_05855	CDS	1052954	1054510	plus	casA	type I-E CRISPR-associated protein Cse1/CasA	defence	none	none	none
AONFFD_05860	CDS	1054507	1055049	plus	casB	type I-E CRISPR-associated protein Cse2/CasB	defence	none	none	none
AONFFD_05865	CDS	1055068	1056123	plus	cas7e	type I-E CRISPR-associated protein Cas7/Cse4/CasC	defence	none	none	none
AONFFD_05870	CDS	1056134	1056880	plus	cas5e	type I-E CRISPR-associated protein Cas5/CasD	defence	maintenance of CRISPR repeat elements (GO:0043571); defense response to virus (GO:0051607)	RNA binding (GO:0003723)	none
AONFFD_05875	CDS	1056862	1057512	plus	cas6e	type I-E CRISPR-associated protein Cas6/Cse3/CasE	defence	none	none	none
AONFFD_05880	CDS	1057509	1058429	plus	cas1e	type I-E CRISPR-associated endonuclease Cas1e	defence	maintenance of CRISPR repeat elements (GO:0043571); defense response to virus (GO:0051607)	nucleic acid binding (GO:0003676); endonuclease activity (GO:0004519); DNA endonuclease activity (GO:0004520); metal ion binding (GO:0046872)	none
AONFFD_05885	CDS	1058429	1058722	plus	cas2e	type I-E CRISPR-associated endoribonuclease Cas2e	defence	none	none	none
not available	CRISPR	1059490	1060982	not available		CRISPR array with 25 repeats of length 29, consensus sequence GTGTTCCCCGCGCCAGCGGGGATAAACCG and spacer length 32	CRISPR	not applicable	not applicable	not applicable
not available	CRISPR-repeat	1059490	1059518	not available		CRISPR repeat	CRISPR	not applicable	not applicable	not applicable
not available	CRISPR-spacer	1059519	1059550	not available		CRISPR spacer, sequence CTCACTAACGCCGTTGCCTGCGATAGCTGATG	CRISPR	not applicable	not applicable	not applicable
not available	CRISPR-repeat	1059551	1059579	not available		CRISPR repeat	CRISPR	not applicable	not applicable	not applicable
not available	CRISPR-spacer	1059580	1059611	not available		CRISPR spacer, sequence AACTGAATGTTCCAAATCCGGTTGGACGACCA	CRISPR	not applicable	not applicable	not applicable
not available	CRISPR-repeat	1059612	1059640	not available		CRISPR repeat	CRISPR	not applicable	not applicable	not applicable
not available	CRISPR-spacer	1059641	1059672	not available		CRISPR spacer, sequence TTCAGCAGCGCGCTCGTCCCCCTCCTGTCGGA	CRISPR	not applicable	not applicable	not applicable
not available	CRISPR-repeat	1059673	1059701	not available		CRISPR repeat	CRISPR	not applicable	not applicable	not applicable
not available	CRISPR-spacer	1059702	1059733	not available		CRISPR spacer, sequence CTCTACTACGATAACGGATCCCACGCGGGCTG	CRISPR	not applicable	not applicable	not applicable
not available	CRISPR-repeat	1059734	1059762	not available		CRISPR repeat	CRISPR	not applicable	not applicable	not applicable
not available	CRISPR-spacer	1059763	1059794	not available		CRISPR spacer, sequence GCTGCCAGCCCATTCCGTAATTGCCTGTTTCA	CRISPR	not applicable	not applicable	not applicable
not available	CRISPR-repeat	1059795	1059823	not available		CRISPR repeat	CRISPR	not applicable	not applicable	not applicable
not available	CRISPR-spacer	1059824	1059855	not available		CRISPR spacer, sequence CAGTAGCAGCCATCGCTGAGGTGAAGGGCTGG	CRISPR	not applicable	not applicable	not applicable
not available	CRISPR-repeat	1059856	1059884	not available		CRISPR repeat	CRISPR	not applicable	not applicable	not applicable
not available	CRISPR-spacer	1059885	1059916	not available		CRISPR spacer, sequence GCGAATATAGGCATTAATGCTTTTAATAATAT	CRISPR	not applicable	not applicable	not applicable
not available	CRISPR-repeat	1059917	1059945	not available		CRISPR repeat	CRISPR	not applicable	not applicable	not applicable
not available	CRISPR-spacer	1059946	1059977	not available		CRISPR spacer, sequence CTCCGTCACCAGTTCTGTGCTATCCGGCACAA	CRISPR	not applicable	not applicable	not applicable
not available	CRISPR-repeat	1059978	1060006	not available		CRISPR repeat	CRISPR	not applicable	not applicable	not applicable
not available	CRISPR-spacer	1060007	1060038	not available		CRISPR spacer, sequence CTCGGTGACCGGCAGATCGTTTTGAAACACAT	CRISPR	not applicable	not applicable	not applicable
not available	CRISPR-repeat	1060039	1060067	not available		CRISPR repeat	CRISPR	not applicable	not applicable	not applicable
not available	CRISPR-spacer	1060068	1060099	not available		CRISPR spacer, sequence CGTCTGGCGAGGTTTACGACGAGCTGACGTTC	CRISPR	not applicable	not applicable	not applicable
not available	CRISPR-repeat	1060100	1060128	not available		CRISPR repeat	CRISPR	not applicable	not applicable	not applicable
not available	CRISPR-spacer	1060129	1060160	not available		CRISPR spacer, sequence TCACGTTTGCAGAACTCGCGGAGGAAGAAGAA	CRISPR	not applicable	not applicable	not applicable
not available	CRISPR-repeat	1060161	1060189	not available		CRISPR repeat	CRISPR	not applicable	not applicable	not applicable
not available	CRISPR-spacer	1060190	1060221	not available		CRISPR spacer, sequence AACGTAATTGGCTTACGGGGCGGTCGGCACAA	CRISPR	not applicable	not applicable	not applicable
not available	CRISPR-repeat	1060222	1060250	not available		CRISPR repeat	CRISPR	not applicable	not applicable	not applicable
not available	CRISPR-spacer	1060251	1060282	not available		CRISPR spacer, sequence CGCGCTGCGAATTTGTTGGTCGATTTCGATCT	CRISPR	not applicable	not applicable	not applicable
not available	CRISPR-repeat	1060283	1060311	not available		CRISPR repeat	CRISPR	not applicable	not applicable	not applicable
not available	CRISPR-spacer	1060312	1060343	not available		CRISPR spacer, sequence TGGGTAGAGGTTAACTGGTTATTGGTCATTGA	CRISPR	not applicable	not applicable	not applicable
not available	CRISPR-repeat	1060344	1060372	not available		CRISPR repeat	CRISPR	not applicable	not applicable	not applicable
not available	CRISPR-spacer	1060373	1060404	not available		CRISPR spacer, sequence ATCGCGGAGGCCTTCGGTGTGTCTCTTTCCTG	CRISPR	not applicable	not applicable	not applicable
not available	CRISPR-repeat	1060405	1060433	not available		CRISPR repeat	CRISPR	not applicable	not applicable	not applicable
not available	CRISPR-spacer	1060434	1060465	not available		CRISPR spacer, sequence CCGTTGTCAATATCTCCCGGCGTCCGCGCCAG	CRISPR	not applicable	not applicable	not applicable
not available	CRISPR-repeat	1060466	1060494	not available		CRISPR repeat	CRISPR	not applicable	not applicable	not applicable
not available	CRISPR-spacer	1060495	1060526	not available		CRISPR spacer, sequence CTGCAGGTAAATGACTGGATGGGGGAAGAGGT	CRISPR	not applicable	not applicable	not applicable
not available	CRISPR-repeat	1060527	1060555	not available		CRISPR repeat	CRISPR	not applicable	not applicable	not applicable
not available	CRISPR-spacer	1060556	1060587	not available		CRISPR spacer, sequence CACGTCCGGAAACCACGGGTTATCCGTGTAAT	CRISPR	not applicable	not applicable	not applicable
not available	CRISPR-repeat	1060588	1060616	not available		CRISPR repeat	CRISPR	not applicable	not applicable	not applicable
not available	CRISPR-spacer	1060617	1060648	not available		CRISPR spacer, sequence CAGAGGTCCTTATCTTTTCAACGTCAAAGTCG	CRISPR	not applicable	not applicable	not applicable
not available	CRISPR-repeat	1060649	1060677	not available		CRISPR repeat	CRISPR	not applicable	not applicable	not applicable
not available	CRISPR-spacer	1060678	1060709	not available		CRISPR spacer, sequence GCAATCCCAGAGCGCGAATATCTTGGGCTCTC	CRISPR	not applicable	not applicable	not applicable
not available	CRISPR-repeat	1060710	1060738	not available		CRISPR repeat	CRISPR	not applicable	not applicable	not applicable
not available	CRISPR-spacer	1060739	1060770	not available		CRISPR spacer, sequence GACATGGCGCGCGAGTTTATCGACGCCTGCGC	CRISPR	not applicable	not applicable	not applicable
not available	CRISPR-repeat	1060771	1060799	not available		CRISPR repeat	CRISPR	not applicable	not applicable	not applicable
not available	CRISPR-spacer	1060800	1060831	not available		CRISPR spacer, sequence GGGATGAGCGTTTTCCGGTGGATTCTGATGTG	CRISPR	not applicable	not applicable	not applicable
not available	CRISPR-repeat	1060832	1060860	not available		CRISPR repeat	CRISPR	not applicable	not applicable	not applicable
not available	CRISPR-spacer	1060861	1060892	not available		CRISPR spacer, sequence GTGATCGTCATGGATATCACTGCCGTTCCGTC	CRISPR	not applicable	not applicable	not applicable
not available	CRISPR-repeat	1060893	1060921	not available		CRISPR repeat	CRISPR	not applicable	not applicable	not applicable
not available	CRISPR-spacer	1060922	1060953	not available		CRISPR spacer, sequence CAGACAGACAGCAGGCAGCAAACAGGGAAGAC	CRISPR	not applicable	not applicable	not applicable
not available	CRISPR-repeat	1060954	1060982	not available		CRISPR repeat	CRISPR	not applicable	not applicable	not applicable
not available	CRISPR-spacer	1060983	1060992	not available		CRISPR spacer, sequence GGGTTCACTT	CRISPR	not applicable	not applicable	not applicable
AONFFD_05890	CDS	1061121	1063142	minus		Tetratricopeptide repeat protein	unclassified	none	none	none
AONFFD_05895	CDS	1063129	1064316	minus		DUF3142 domain-containing protein	unclassified	none	none	none
AONFFD_05900	CDS	1064352	1065407	minus	iap	aminopeptidase	metabolism	proteolysis (GO:0006508)	metalloexopeptidase activity (GO:0008235)	none
AONFFD_05905	CDS	1065645	1067060	plus	cysG	siroheme synthase CysG	metabolism	cobalamin biosynthetic process (GO:0009236); siroheme biosynthetic process (GO:0019354)	uroporphyrin-III C-methyltransferase activity (GO:0004851); precorrin-2 dehydrogenase activity (GO:0043115); sirohydrochlorin ferrochelatase activity (GO:0051266); NAD binding (GO:0051287)	none
AONFFD_05910	CDS	1067070	1067978	plus	cysD	sulfate adenylyltransferase subunit CysD	metabolism	sulfate assimilation (GO:0000103)	catalytic activity (GO:0003824); sulfate adenylyltransferase (ATP) activity (GO:0004781)	none
AONFFD_05915	CDS	1067988	1069415	plus	cysN	sulfate adenylyltransferase subunit CysN	metabolism	sulfur compound metabolic process (GO:0006790)	none	none
AONFFD_05920	CDS	1069415	1070020	plus	cysC	Adenylyl-sulfate kinase	metabolism	sulfate assimilation (GO:0000103)	adenylylsulfate kinase activity (GO:0004020); ATP binding (GO:0005524)	none
AONFFD_05925	CDS	1070071	1070397	plus		DUF3561 domain-containing protein	unclassified	none	none	none
AONFFD_05930	CDS	1070538	1070855	plus	ftsB	cell division protein FtsB	cell division	FtsZ-dependent cytokinesis (GO:0043093)	none	cell septum (GO:0030428)

## Sheet: Supplementary Table 5
Supplementary Table 5. Locations and predicted biological functions of genetic features within the 33.5-kbp region illustrated in Supplementary Figure 4, Additional File 2. Locus tags and coordinates of these features refer to annotations of the KpMVS1 chromosome. Abbreviations: CDS, coding sequence; SORF, short open reading frame.
Locus	Type	Start	Stop	Strand	Gene	Product	Functional category	Biological process	Molecular function	Cellular component
AONFFD_16235	CDS	3188430	3188822	plus	aCTx2	ACT domain-containing protein	unclassified	none	none	none
AONFFD_16240	CDS	3188819	3189532	plus	arsR	DNA-binding transcriptional regulator, ArsR family	transcriptional regulation	response to lead ion (GO:0010288); regulation of gene expression (GO:0010468); response to cadmium ion (GO:0046686)	DNA binding (GO:0003677); DNA-binding transcription factor activity (GO:0003700); lead ion binding (GO:0032791); cadmium ion sensor activity (GO:0097063)	none
AONFFD_16245	CDS	3189805	3189957	minus	icd	NADP-dependent isocitrate dehydrogenase	metabolism	tricarboxylic acid cycle (GO:0006099)	isocitrate dehydrogenase (NADP+) activity (GO:0004450)	none
AONFFD_16250	CDS	3190136	3190507	minus	umuD	Error-prone repair protein UmuD	DNA repair	none	none	none
AONFFD_16255	CDS	3190464	3190703	minus		DNA polymerase V	DNA repair	none	none	none
AONFFD_16260	CDS	3190781	3192268	minus	ltrA	group II intron reverse transcriptase/maturase	DNA repair	none	none	none
AONFFD_16265	CDS	3192882	3193124	plus	dinI	DinI family protein	DNA repair	none	none	none
AONFFD_16270	CDS	3193295	3194434	minus	rfaF	ADP-heptose:LPS heptosyltransferase	metabolism	lipopolysaccharide core region biosynthetic process (GO:0009244)	ADP-heptose-lipopolysaccharide heptosyltransferase activity (GO:0008713); glycosyltransferase activity (GO:0016757)	cytosol (GO:0005829)
AONFFD_16275	CDS	3194678	3195178	plus	proX	Prolyl-tRNA editing protein ProX	metabolism	none	aminoacyl-tRNA editing activity (GO:0002161)	none
AONFFD_16280	CDS	3195295	3195741	plus		UPF0756 membrane protein KPN78578_11500	membrane biosynthesis	none	none	plasma membrane (GO:0005886)
AONFFD_16285	CDS	3195725	3196516	minus	araC	AraC-type DNA-binding domain and AraC-containing proteins	transcriptional regulation	regulation of DNA-templated transcription (GO:0006355)	DNA binding (GO:0003677)	none
AONFFD_16290	CDS	3196617	3197801	plus	cynX	Cyanate permease	transmembrane transport	transmembrane transport (GO:0055085)	transmembrane transporter activity (GO:0022857)	membrane (GO:0016020)
AONFFD_16295	CDS	3197833	3198525	minus	pyrG	CTP synthase (UTP-ammonia lyase)	metabolism	pyrimidine nucleotide biosynthetic process (GO:0006221); CTP biosynthetic process (GO:0006241); pyrimidine nucleobase biosynthetic process (GO:0019856)	CTP synthase activity (GO:0003883); identical protein binding (GO:0042802)	cytosol (GO:0005829)
AONFFD_16300	CDS	3198671	3199180	plus	ybbK	DUF523 domain-containing protein	unclassified	none	none	none
AONFFD_16305	CDS	3199167	3199523	plus	yeaO	DUF488 domain-containing protein	unclassified	none	none	none
AONFFD_16310	CDS	3199513	3199752	minus	hlx	Putative hemolysin	unclassified	none	none	none
AONFFD_16315	CDS	3200053	3201066	plus	gAF	GAF domain	unclassified	none	none	none
AONFFD_16320	CDS	3201124	3201225	plus	yoaK	YoaK family small membrane protein	unclassified	none	none	none
AONFFD_16325	SORF	3201225	3201299	plus	yoaJ	protein YoaJ	unclassified	none	none	none
AONFFD_16330	CDS	3201602	3201865	minus		Membrane associated protein	unclassified	none	none	none
AONFFD_16335	CDS	3201996	3202634	minus	leuE	leucine efflux protein LeuE	transmembrane transport	amino acid transport (GO:0006865); leucine transport (GO:0015820)	amino acid transmembrane transporter activity (GO:0015171); L-leucine transmembrane transporter activity (GO:0015190)	membrane (GO:0016020)
AONFFD_16340	CDS	3202724	3203638	minus	lpxP	kdo(2)-lipid IV(A) palmitoleoyltransferase	membrane biosynthesis	lipid A biosynthetic process (GO:0009245); response to cold (GO:0009409); Kdo2-lipid A biosynthetic process (GO:0036104)	palmitoleoyl [acyl-carrier-protein]-dependent acyltransferase activity (GO:0008951); transferase activity (GO:0016740)	membrane (GO:0016020)
AONFFD_16345	CDS	3204300	3205343	minus	ansA	L-asparaginase/archaeal Glu-tRNAGln amidotransferase subunit D	metabolism	asparagine metabolic process (GO:0006528)	asparaginase activity (GO:0004067)	none
AONFFD_16350	CDS	3205646	3206854	plus	hDGYP	HD-GYP domain, c-di-GMP phosphodiesterase class II (or its inactivated variant)	unclassified	none	none	none
AONFFD_16355	CDS	3206928	3208712	plus	hAMP	HAMP domain	membrane biosynthesis	cell adhesion involved in single-species biofilm formation (GO:0043709); negative regulation of bacterial-type flagellum-dependent cell motility (GO:1902201)	diguanylate cyclase activity (GO:0052621)	plasma membrane (GO:0005886)
AONFFD_16360	CDS	3208719	3209609	minus	lysR	DNA-binding transcriptional regulator, LysR family	transcriptional regulation	regulation of DNA-templated transcription (GO:0006355)	DNA-binding transcription factor activity (GO:0003700)	protein-DNA complex (GO:0032993)
AONFFD_16365	CDS	3209954	3211240	plus	ubiD	3-polyprenyl-4-hydroxybenzoate decarboxylase	metabolism	none	carboxy-lyase activity (GO:0016831)	cytoplasm (GO:0005737)
AONFFD_16370	CDS	3211551	3212237	minus	eAL	EAL domain, c-di-GMP-specific phosphodiesterase class I (or its enzymatically inactive variant)	unclassified	none	none	none
AONFFD_16375	CDS	3212854	3213486	minus		DNA-binding protein	unclassified	none	none	none
AONFFD_16380	CDS	3213573	3213677	minus		(pseudo) EscU/YscU/HrcU family type III secretion system export apparatus switch protein	unclassified	none	none	none
AONFFD_16385	CDS	3214053	3214250	plus		hypothetical protein	unclassified	none	none	none
AONFFD_16390	CDS	3214366	3215376	minus	cydB	cytochrome d ubiquinol oxidase subunit II	metabolism	aerobic electron transport chain (GO:0019646)	electron transfer activity (GO:0009055); oxidoreductase activity, acting on diphenols and related substances as donors, oxygen as acceptor (GO:0016682)	membrane (GO:0016020); cytochrome complex (GO:0070069)
AONFFD_16395	CDS	3215373	3216779	minus	appC	Cytochrome bd-type quinol oxidase, subunit 1	metabolism	aerobic electron transport chain (GO:0019646)	electron transfer activity (GO:0009055); oxidoreductase activity, acting on diphenols and related substances as donors, oxygen as acceptor (GO:0016682); heme binding (GO:0020037)	plasma membrane (GO:0005886); cytochrome complex (GO:0070069)
AONFFD_16400	CDS	3216835	3217722	minus	cotJC	Mn-containing catalase (includes spore coat protein CotJC)	unclassified	none	none	none
AONFFD_16405	CDS	3217739	3218245	minus	yciE	Ferritin-like metal-binding protein YciE	unclassified	none	none	none
AONFFD_16410	CDS	3218272	3218766	minus	yciE	Ferritin-like metal-binding protein YciE	unclassified	none	none	none
AONFFD_16415	CDS	3218857	3219042	minus	gsiB	General stress protein YciG, contains tandem KGG domains	unclassified	none	none	none
AONFFD_16420	CDS	3219664	3220857	plus	tdh	Threonine dehydrogenase or related Zn-dependent dehydrogenase	unclassified	none	none	none
AONFFD_16425	CDS	3220970	3221197	plus		DUF1272 domain-containing protein	unclassified	none	none	none
AONFFD_16430	CDS	3221647	3221970	plus	jemB	JemB	unclassified	none	none	none
AONFFD_16435	CDS	3221963	3222355	plus	aCTx2	ACT domain-containing protein	unclassified	none	none	none
AONFFD_16440	CDS	3222352	3223065	plus	arsR	DNA-binding transcriptional regulator, ArsR family	transcriptional regulation	response to lead ion (GO:0010288); regulation of gene expression (GO:0010468); response to cadmium ion (GO:0046686)	DNA binding (GO:0003677); DNA-binding transcription factor activity (GO:0003700); lead ion binding (GO:0032791); cadmium ion sensor activity (GO:0097063)	none
AONFFD_16445	CDS	3223337	3223489	minus	icd	NADP-dependent isocitrate dehydrogenase	metabolism	tricarboxylic acid cycle (GO:0006099)	isocitrate dehydrogenase (NADP+) activity (GO:0004450)	none
AONFFD_16450	CDS	3223668	3224039	minus	umuD	Error-prone repair protein UmuD	DNA repair	none	none	none
AONFFD_16455	CDS	3223996	3224235	minus		DNA polymerase V	DNA repair	none	none	none
AONFFD_16460	CDS	3224313	3225800	minus	ltrA	group II intron reverse transcriptase/maturase	DNA repair	none	none	none
AONFFD_16465	CDS	3227289	3227558	plus		hypothetical protein	unclassified	none	none	none

## Sheet: Supplementary Table 6
Supplementary Table 6. Locations and predicted biological functions of genetic features within the 4.9-kbp region illustrated in Supplementary Figure 5, Additional File 2. Locus tags and coordinates of these features refer to annotations of the KpMVS1 chromosome. “IS3H*” denotes the same variant of the IS3-family insertion sequence IS3H (79% nucleotide identity and 100% query coverage). Abbreviat…
Locus	Type	Start	Stop	Strand	Gene	Product	Functional category	Biological process	Molecular function	Cellular component
AONFFD_18150	CDS	3577888	3579480	minus	uup	ABC-F family ATPase	unclassified	none	none	none
AONFFD_18155	CDS	3579515	3580336	plus		Resolvase, N terminal domain	DNA recombination	DNA recombination (GO:0006310)	DNA strand exchange activity (GO:0000150)	none
IS3H_1	IS	3580334	3581591	plus	IS3H*	IS3-family element	IS	none	none	none
AONFFD_18170	CDS	3581820	3582272	plus		Resolvase, N terminal domain	unclassified	none	none	none
AONFFD_18175	CDS	3582587	3582991	plus		hypothetical protein	unclassified	none	none	none
AONFFD_18180	CDS	3584416	3585057	minus		Recombinase family protein	DNA recombination	DNA recombination (GO:0006310)	DNA strand exchange activity (GO:0000150); DNA binding (GO:0003677)	none
IS3H_2	IS	3585228	3586485	plus	IS3H*	IS3-family element	IS	none	none	none
IS3H_3	IS	3587069	3588326	minus	IS3H*	IS3-family element	IS	none	none	none
AONFFD_18205	CDS	3588370	3588573	plus		hypothetical protein	rugulation (phosphorylation)	none	phosphoprotein phosphatase activity (GO:0004721)	none
AONFFD_18210	CDS	3588699	3589688	plus	ldtB	L,D-transpeptidase	cell wall biosynthesis	peptidoglycan-protein cross-linking (GO:0018104)	peptidoglycan L,D-transpeptidase activity (GO:0071972)	extracellular region (GO:0005576)

## Sheet: Supplementary Table 7
Supplementary Table 7. Amino acid variation identified in pairwise sequence comparisons between TraN proteins. Columns “Subject” and “Reference” source plasmids of the TraN sequences. Amino acid alterations in the tip/sensor domains of TraN are highlighted in red. Note that pKpMVR1_1 and pKpMVS2_1 produced the same TraN sequence.
Subject	Reference	Amino acid substitutions
pKpMVR1_1	pKpMVS1_1	S16G A70T N209D A215V S305A T309I
pKpMVS1_1	pKpQIL	A17T R29S S31G D65A S66N T70A A100T A194T S232A N261S M268I G286A A297V S345N A602E G606R K611M
pKpMVR1_1	pKpQIL	S16G A17T R29S S31G D65A S66N A100T A194T N209D A215V S232A N261S M268I G286A A297V S305A T309I S345N A602E G606R K611M
